# Supplementary material
Source: PubMed Central journal article supplement (PMC2712143)
Supplement: mmc1.pdf [file mmc1.pdf]

Biophysical Journal, Volume 96

**Supporting Material**

**Binding the Mammalian High Mobility Group Protein AT-hook 2 to AT-Rich Deoxyoligonucleotides: Enthalpy-Entropy Compensation**

Suzanne Joynt, Victor Morillo, and Fenfei Leng

## SUPPLEMENTARY MATERIALS

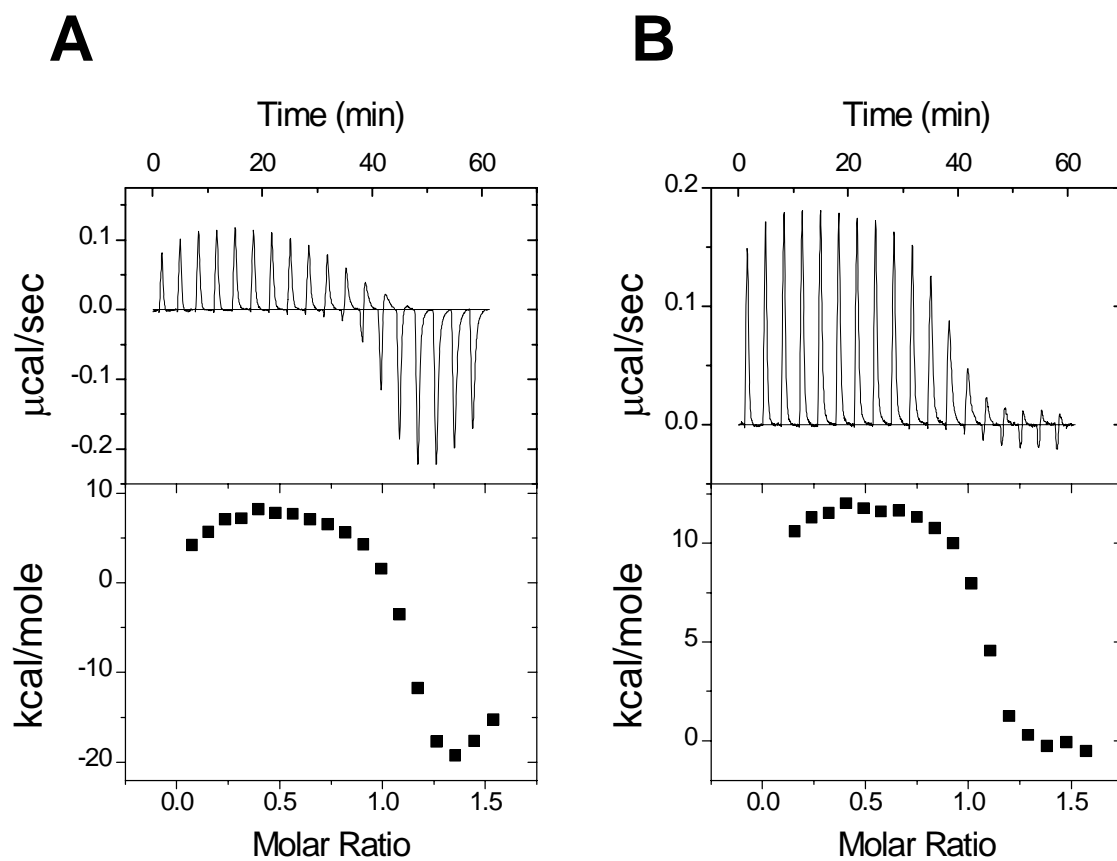

**Figure S1.** The unusual ITC titration curves are dependent on the salt concentration. Sample raw data for the titration of HMGA2 into FL-AT-1 at 5 °C in 1×BPE containing (A) 100 mM or (B) 150 mM of NaCl. Top, each peak shows the heat produced by injection of an aliquot of 15  $\mu\text{l}$  of HMGA2 (35.7  $\mu\text{M}$ ) into DNA solution (1.44 ml of 5  $\mu\text{M}$ ). Bottom, the binding isotherm generated from integration with respect of time with appropriate dilution correction.

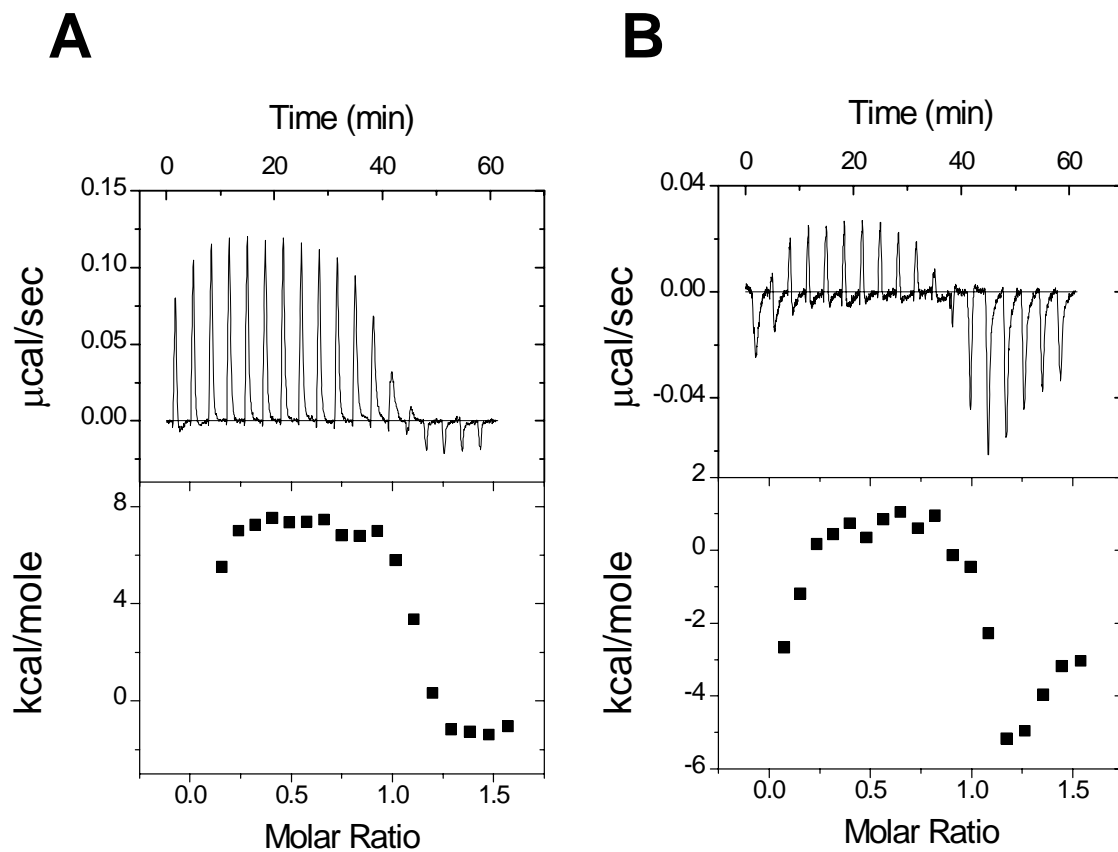

**Figure S2.** The unusual ITC titration curves are dependent on the experimental temperature. Sample raw data for the titration of HMGA2 into FL-AT-1 in 1 $\times$ BPE containing 150 mM of NaCl at (A) 15 °C and (B) 25 °C. Top, each peak shows the heat produced by injection of an aliquot of 15  $\mu\text{l}$  of HMGA2 (35.7  $\mu\text{M}$ ) into DNA solution (1.44 ml of 5  $\mu\text{M}$ ). Bottom, the binding isotherm generated from integration with respect of time with appropriate dilution correction.
